# Supplementary material
Source: PubMed Central journal article supplement (PMC3674188)
Supplement: NIHMS423309-supplement-01.pdf [file NIHMS423309-supplement-01.pdf]

**Table 2. Cases that failed to retain the Boston Keratoprosthesis.**

| Case | Pre-Operative Diagnosis          | Age, Sex | # Of Prior Grafts | Ocular History                                         | Months Retained | Post-Operative Complications & Procedures (post-operative time) | Cause Of Failure            | Status At Last Follow Up |
|------|----------------------------------|----------|-------------------|--------------------------------------------------------|-----------------|-----------------------------------------------------------------|-----------------------------|--------------------------|
| 1    | Failed Graft                     | 58, M    | 0                 | Glaucoma, Ocular Surface Tumor, Exposure, Facial Palsy | 6               | Lysis of Symblepharon (1 m), RPM (6 m)                          | Fungal Endophthalmitis      | Replacement KPro         |
| 2    | Failed Graft, Herpetic Keratitis | 74, F    | 5                 | Glaucoma, AMD, Herpetic Keratitis                      | 17              | Nd:YAG RPM (1m); Serous Choroidals/ CME (17 m)                  | Fungal Keratitis            | Replacement KPro         |
| 3    | SJS                              | 47, F    | 0                 | Glaucoma, LASIK                                        | 18              | Keratolysis (6 m), Fungal Keratitis (12 m)                      | Fungal Keratitis            | Replacement KPro         |
| 4    | OCP                              | 61, F    | 0                 | Glaucoma, Severe Dry Eye                               | 24              |                                                                 | Extrusion                   | Self-sealing membrane    |
| 5    | Failed Graft                     | 39, F    | 8                 | Neurotrophic, Herpetic Keratitis                       | 23              | RPM (1 week), Nd:YAG RPM (1 m)                                  | Dense RPM                   | KPro Replaced            |
| 6    | OCP                              | 55, M    | 0                 | Fungal Keratitis                                       | 15              | Keratolysis (12 m), RD (12 m)                                   | Keratolysis                 | Replaced by PKP, no KPro |
| 7    | SJS                              | 49, M    | 0                 | Glaucoma, Human Immunodeficiency Virus, Uveitis        | 8               |                                                                 | Fungal Keratitis            | Replacement KPro         |
| 8    | Trauma, Bullous Keratopathy      | 35, M    | 0                 | Pupillary Membrane                                     | 35              | Iris Adhesion to Backplate (1 m), Nd:YAG RPM (6 m)              | Keratolysis                 | Replacement KPro         |
| 9    | SJS, Failed Graft                | 70, M    | 1                 | Glaucoma                                               | 11              | Nd:YAG RPM(6 m), Keratolysis (12 m)                             | Keratolysis                 | Replacement KPro         |
| 10   | OCP                              | 80, F    | 0                 |                                                        | 14              | Tars. (1 m), Repeat Tars (6 m), RPM (6 m)                       | Fungal keratitis            | Replacement KPro         |
| 11   | Graft failure chemical burn      | 56, M    | 3                 | Glaucoma                                               | 4               |                                                                 | Extrusion                   | Replacement KPro         |
| 12   | Acidic Chemical Burn             | 48, M    | 3                 | Glaucoma / Tube Shunt                                  | 12              | Fungal Keratitis (6 m)                                          | Fungal Keratitis, Extrusion | Replacement KPro         |

|           |                        |       |   |                                             |    |                                           |                              |                          |
|-----------|------------------------|-------|---|---------------------------------------------|----|-------------------------------------------|------------------------------|--------------------------|
| <b>13</b> | Failed Graft           | 62, M | 1 | Corneal Scar, Bullous Keratopathy, Glaucoma | 34 |                                           | Keratolysis                  | Replacement KPro         |
| <b>14</b> | Failed Graft, OCP      | 63, M | 3 | Glaucoma, Exposure, Dry Eye                 | 40 | Exposure (6 m), Repeat Tars (6 m)         | Suspected Fungal Keratitis   | Replacement KPro         |
| <b>15</b> | Failed Graft           | 80, F | 1 | Fuchs Dystrophy                             | 9  | RPM (1 m), Vitritis (6 m)                 | Endophthalmitis              | Replacement KPro         |
| <b>16</b> | Failed Graft           | 72, M | 2 | Ocular Trauma, Glaucoma                     | 40 | RPM (12 m)                                | Dense RPM                    | Replacement KPro         |
| <b>17</b> | Failed Graft, Aniridia | 38, M | 1 | Glaucoma                                    | 15 | Nd:YAG RPM (6 m)                          | Extrusion                    | Replacement KPro         |
| <b>18</b> | Failed Graft           | 50, F | 5 | Perforated Corneal Ulcer, Glaucoma          | 8  | Dense RPM (1 m), Retinal Detachment (1 m) | Fibrovascular RPM            | Enucleated               |
| <b>19</b> | OCP                    | 35, M | 2 | Glaucoma, Exposure                          | 5  | RPM (1 m)                                 | Extrusion                    | Replaced by PKP, no KPro |
| <b>20</b> | Darier's Disease       | 76, F | 0 | Severe Cicatricial Disease, Symblepharon    | 2  |                                           | Fungal & Bacterial Keratitis | Enucleated               |
| <b>21</b> | Failed Graft, SJS      | F     | 2 | Dry Eye                                     | 9  | Iris Adhesion to KPro optic (1 m)         | Keratolysis                  | Replacement KPro         |

M = Male, F = Female, m = months, RPM = Retroprosthetic Membrane, Nd:YAG = neodymium:yttrium-aluminum-garnet, KPro = Keratoprosthesis, SJS = Steven Johnson Syndrome, OCP = Ocular Cicatricial Pemphigoid, Tars = Tarsorrhaphy, CME = Cystoid Macular Edema
