# Supplementary material
Source: PubMed Central journal article supplement (PMC3674188)
Supplement: NIHMS423309-supplement-02.pdf [file NIHMS423309-supplement-02.pdf]

Boston Type 1 Keratoprosthesis Study Group: Claes H. Dohlman, MD; James Aquavella, MD; Michael W. Belin, MD; Anthony J. Aldave, MD; Sadeer B. Hannush, MD; Kimberly C. Sippel, MD; Mark J. Mannis, MD; Nathalie A. Afshari, MD; Tueng T. Shen, MD; Eduardo C. Alfonso, MD; Marian S. Macsai, MD; Geoffrey Tabin, MD; Keith H. Baratz, MD; Ramzi K. Hemady, MD; Juan-Carlos Abad, MD; Samir A. Melki, MD; Roberta Pineda II, MD.
